# Supplementary material
Source: PubMed Central journal article supplement (PMC4658488)
Supplement: supp_115.226365_jpet226365Supplemental_Data.pdf [file supp_115.226365_jpet226365Supplemental_Data.pdf]

Rondini EA, Pant A, and Kocarek TA. Transcriptional regulation of cytosolic sulfotransferase (SULT)1C2 by intermediates of the cholesterol biosynthetic pathway in primary cultured rat hepatocytes. *The Journal of Pharmacology and Experimental Therapeutics*.

**Supplemental Table 1.** Primer pairs and corresponding gene sequence alignments used to generate the rat SULT1C2 promoter constructs.

| Construct Name | Forward (5' → 3') <sup>a</sup>   | Reverse (5' → 3') <sup>a</sup> | Fragment Size (bp) | RACE Alignment Reference | Gene Alignment Reference <sup>b</sup> |
|----------------|----------------------------------|--------------------------------|--------------------|--------------------------|---------------------------------------|
| 1C2-1          | GCGGCTAGCCTGTCCTTTCTTCATATGTGT   | GCGGCTAGCCCTCCAAAATGCTGCGATTCC | 3092               | -3140:-49                | 5686-8777                             |
| 1C2-2          | GCGGGTACCAGCCAGTATTTTAGTTTCTCC   | GCGCTCGAGCCTCCAAAATGCTGCGATTCC | 2727               | -2775:-49                | 6051-8777                             |
| 1C2-2d1        | GCGGGTACCCTTAGACTCGTGTTCTGAAATG  | GCGCTCGAGCCTCCAAAATGCTGCGATTCC | 2616               | -2664:-49                | 6162-8777                             |
| 1C2-2d2        | GCGGGTACCCTTACTTAGTGAATCCTGGT    | GCGCTCGAGCCTCCAAAATGCTGCGATTCC | 2531               | -2579:-49                | 6247-8777                             |
| 1C2-2d3        | GCGGGTACCATCACGAGTCTTAAAAGGTAA   | GCGCTCGAGCCTCCAAAATGCTGCGATTCC | 2476               | -2524:-49                | 6302-8777                             |
| 1C2-2d4        | GCGGGTACCAGCTTTTGAGTTATTTTCG     | GCGCTCGAGCCTCCAAAATGCTGCGATTCC | 2354               | -2402:-49                | 6424-8777                             |
| 1C2-3          | GCGGCTAGCCTCTGTGCATTTCTCTAAACA   | GCGGCTAGCCCTCCAAAATGCTGCGATTCC | 2172               | -2220:-49                | 6606-8777                             |
| 1C2-4          | GCGGGTACCATCTCAACTTAATGACATCT    | GCGCTCGAGCCTCCAAAATGCTGCGATTCC | 233                | -281:-49                 | 8545-8777                             |
| 1C2-4d1        | GCGGGTACCCTTAAAGTAAGAAGATTAGAGC  | GCGCTCGAGCCTCCAAAATGCTGCGATTCC | 184                | -232:-49                 | 8594-8777                             |
| 1C2-4d2        | GCGGGTACCCTCCATCATATTCACCAATGC   | GCGCTCGAGCCTCCAAAATGCTGCGATTCC | 132                | -180:-49                 | 8646-8777                             |
| 1C2-4d3        | GCGGGTACCCTCAAATAGTTTGCTGTTGCTCA | GCGCTCGAGCCTCCAAAATGCTGCGATTCC | 91                 | -139:-49                 | 8687-8777                             |
| 1C2-5          | GCGGGTACCCTGCAACAAGATGTGGTAGTAC  | GCGCTCGAGCCTCCAAAATGCTGCGATTCC | 48                 | -96:-49                  | 8730-8777                             |

<sup>a.</sup> All sequences are presented as 5' → 3'. Underscored nucleotides represent restriction sites used for cloning into the pGL4.10 promoterless firefly reporter plasmid.

<sup>b.</sup> Alignments correspond to the nucleotide positions on the rat SULT1C2 gene, chromosome regions 4654278- 4685416 (reverse complement) of the NCBI reference sequence NC\_005108.4 located on rat chromosome 9.



Rondini EA, Pant A, and Kocarek TA. Transcriptional regulation of cytosolic sulfotransferase (SULT)1C2 by intermediates of the cholesterol biosynthetic pathway in primary cultured rat hepatocytes. *The Journal of Pharmacology and Experimental Therapeutics*.

|             |                                                                |     |             |                                                               |     |
|-------------|----------------------------------------------------------------|-----|-------------|---------------------------------------------------------------|-----|
| EXON5_CL1   | CAGAGGGTACTTGC                                                 | 60  | EXON5_CL1   | AAGAAATTGTCGACATGATTGAGCAGAATGGGGATGT-----                    | 400 |
| EXON5_CL2   | CAGAGGGTACTTGC                                                 | 60  | EXON5_CL2   | AAGAAATTGTCGACATGATTGAGCAGAATGGGGATGT-----                    | 400 |
| EXON5_CL3   | CAGAGGGTACTTGC                                                 | 60  | EXON5_CL3   | AAGAAATTGTCGACATGATTGAGCAGAATGGGGATGT-----                    | 517 |
| EXON5_CL4   | CAGAGGGTACTTGC                                                 | 60  | EXON5_CL4   | AAGAAATTGTCGACATGATTGAGCAGAATGGGGATGT-----                    | 514 |
| EXON8_9_CL1 | CAGAGGGTACTTGC                                                 | 60  | EXON8_9_CL1 | AAGAAATTGTCGACATGATTGAGCAGAATGGGGATGTAGAGAAAGTCCAGAGGACCCATCA | 423 |
| EXON8_9_CL2 | CAGAGGGTACTTGC                                                 | 60  | EXON8_9_CL2 | AAGAAATTGTCGACATGATTGAGCAGAATGGGGATGTAGAGAAAGTCCAGAGGACCCATCA | 423 |
| EXON8_9_CL3 | CAGAGGGTACTTGC                                                 | 60  | EXON8_9_CL3 | AAGAAATTGTCGACATGATTGAGCAGAATGGGGATGTAGAGAAAGTCCAGAGGACCCATCA | 540 |
| EXON8_9_CL4 | CAGAGGGTACTTGC                                                 | 60  | EXON8_9_CL4 | AAGAAATTGTCGACATGATTGAGCAGAATGGGGATGTAGAGAAAGTCCAGAGGACCCATCA | 540 |
|             | *****                                                          |     |             | *****                                                         |     |
| EXON5_CL1   | TTTCCTTTATTC                                                   | 120 | EXON5_CL1   | -----                                                         | 400 |
| EXON5_CL2   | TTTCCTTTATTC                                                   | 120 | EXON5_CL2   | -----                                                         | 400 |
| EXON5_CL3   | TTTCCTTTATTC                                                   | 120 | EXON5_CL3   | -----                                                         | 517 |
| EXON5_CL4   | TTTCCTTTATTC                                                   | 120 | EXON5_CL4   | -----                                                         | 514 |
| EXON8_9_CL1 | TTTCCTTTATTC                                                   | 120 | EXON8_9_CL1 | TTCAACACCGACACCCCTTTTATTGAGTGGGCTCGGCCACCCCAACCATCAGGTGTGGACA | 483 |
| EXON8_9_CL2 | TTTCCTTTATTC                                                   | 120 | EXON8_9_CL2 | TTCAACACCGACACCCCTTTTATTGAGTGGGCTCGGCCACCCCAACCATCAGGTGTGGACA | 483 |
| EXON8_9_CL3 | TTTCCTTTATTC                                                   | 120 | EXON8_9_CL3 | TTCAACACCGACACCCCTTTTATTGAGTGGGCTCGGCCACCCCAACCATCAGGTGTGGACA | 600 |
| EXON8_9_CL4 | TTTCCTTTATTC                                                   | 120 | EXON8_9_CL4 | TTCAACACCGACACCCCTTTTATTGAGTGGGCTCGGCCACCCCAACCATCAGGTGTGGACA | 600 |
|             | *****                                                          |     |             | *****                                                         |     |
| EXON5_CL1   | CAGGTCCCATTGT                                                  | 169 | EXON5_CL1   | -----                                                         | 400 |
| EXON5_CL2   | CAGGTCCCATTGT                                                  | 169 | EXON5_CL2   | -----                                                         | 400 |
| EXON5_CL3   | CAGGTCCCATTGT                                                  | 180 | EXON5_CL3   | -----                                                         | 517 |
| EXON5_CL4   | CAGGTCCCATTGT                                                  | 177 | EXON5_CL4   | -----                                                         | 514 |
| EXON8_9_CL1 | CAGGTCCCATTGT                                                  | 169 | EXON8_9_CL1 | AAGCCAATGCGATGCCAGCTCCAAGGATATTAAGGACCCCATCTCCACACACAGCTGTGTC | 543 |
| EXON8_9_CL2 | CAGGTCCCATTGT                                                  | 169 | EXON8_9_CL2 | AAGCCAATGCGATGCCAGCTCCAAGGATATTAAGGACCCCATCTCCACACACAGCTGTGTC | 660 |
| EXON8_9_CL3 | CAGGTCCCATTGT                                                  | 180 | EXON8_9_CL3 | AAGCCAATGCGATGCCAGCTCCAAGGATATTAAGGACCCCATCTCCACACACAGCTGTGTC | 660 |
| EXON8_9_CL4 | CAGGTCCCATTGT                                                  | 180 | EXON8_9_CL4 | AAGCCAATGCGATGCCAGCTCCAAGGATATTAAGGACCCCATCTCCACACACAGCTGTGTC | 660 |
|             | *****                                                          |     |             | *****                                                         |     |
| EXON5_CL1   | -----                                                          | 169 | EXON5_CL1   | -----                                                         | 400 |
| EXON5_CL2   | -----                                                          | 169 | EXON5_CL2   | -----                                                         | 400 |
| EXON5_CL3   | AGATTACAGCGGCTGGGTGAAATGAAGTTTTGCACACCAAGAGGCTAGGGGAAAGCATCC   | 240 | EXON5_CL3   | -----                                                         | 517 |
| EXON5_CL4   | AGATTACAGCGGCTGGGTGAAATGAAGTTTTGCACACCAAGAGGCTAGGGGAAAGCATCC   | 237 | EXON5_CL4   | -----                                                         | 514 |
| EXON8_9_CL1 | -----                                                          | 169 | EXON8_9_CL1 | CACCGTCTTTCCGGACAAAACACTGTAAGTTCCTTTATGTTGGCTCGAAATGCCAAAGACT | 603 |
| EXON8_9_CL2 | -----                                                          | 169 | EXON8_9_CL2 | CACCGTCTTTCCGGACAAAACACTGTAAGTTCCTTTATGTTGGCTCGAAATGCCAAAGACT | 703 |
| EXON8_9_CL3 | AGATTACAGCGGCTGGGTGAAATGAAGTTTTGCACACCAAGAGGCTAGGGGAAAGCATCC   | 240 | EXON8_9_CL3 | CACCGTCTTTCCGGACAAAACACTGTAAGTTCCTTTATGTTGGCTCGAAATGCCAAAGACT | 620 |
| EXON8_9_CL4 | AGATTACAGCGGCTGGGTGAAATGAAGTTTTGCACACCAAGAGGCTAGGGGAAAGCATCC   | 240 | EXON8_9_CL4 | CACCGTCTTTCCGGACAAAACACTGTAAGTTCCTTTATGTTGGCTCGAAATGCCAAAGACT | 720 |
|             | *****                                                          |     |             | *****                                                         |     |
| EXON5_CL1   | -----                                                          | 183 | EXON5_CL1   | -----                                                         | 400 |
| EXON5_CL2   | -----                                                          | 183 | EXON5_CL2   | -----                                                         | 400 |
| EXON5_CL3   | CTCCTCAGTTCATCGTGCATGACATCAGCCCTCTGTTCTGTTGTGTCAGGGACTAAACCTTC | 300 | EXON5_CL3   | -----                                                         | 517 |
| EXON5_CL4   | CTCCTCAGTTCATCGTGCATGACATCAGCCCTCTGTTCTGTTGTGTCAGGGACTAAACCTTC | 297 | EXON5_CL4   | -----                                                         | 514 |
| EXON8_9_CL1 | -----                                                          | 183 | EXON8_9_CL1 | GCATGGTTCTCTACTACCCTCTACAGGATGAGCCAGGTGCTCCCGATCCAGGCACCC     | 663 |
| EXON8_9_CL2 | -----                                                          | 183 | EXON8_9_CL2 | GCATGGTTCTCTACTACCCTCTACAGGATGAGCCAGGTGCTCCCGATCCAGGCACCC     | 663 |
| EXON8_9_CL3 | CTCCTCAGTTCATCGTGCATGACATCAGCCCTCTGTTCTGTTGTGTCAGGGACTAAACCTTC | 300 | EXON8_9_CL3 | GCATGGTTCTCTACTACCCTCTACAGGATGAGCCAGGTGCTCCCGATCCAGGCACCC     | 780 |
| EXON8_9_CL4 | CTCCTCAGTTCATCGTGCATGACATCAGCCCTCTGTTCTGTTGTGTCAGGGACTAAACCTTC | 300 | EXON8_9_CL4 | GCATGGTTCTCTACTACCCTCTACAGGATGAGCCAGGTGCTCCCGATCCAGGCACCC     | 780 |
|             | *****                                                          |     |             | *****                                                         |     |
| EXON5_CL1   | TTCCCTGAGACATCATG                                              | 243 | EXON5_CL1   | -----                                                         | 400 |
| EXON5_CL2   | TTCCCTGAGACATCATG                                              | 243 | EXON5_CL2   | -----                                                         | 400 |
| EXON5_CL3   | TTCCCTGAGACATCATG                                              | 360 | EXON5_CL3   | -----                                                         | 517 |
| EXON5_CL4   | TTCCCTGAGACATCATG                                              | 357 | EXON5_CL4   | -----                                                         | 514 |
| EXON8_9_CL1 | TTCCCTGAGACATCATG                                              | 243 | EXON8_9_CL1 | GGAAATGAGTATTTTGAACCTTCACTCAATGGAAAAGTAAAGTGGGGATCTGGTTTGAAC  | 723 |
| EXON8_9_CL2 | TTCCCTGAGACATCATG                                              | 243 | EXON8_9_CL2 | GGAAATGAGTATTTTGAACCTTCACTCAATGGAAAAGTAAAGTGGGGATCTGGTTTGAAC  | 723 |
| EXON8_9_CL3 | TTCCCTGAGACATCATG                                              | 360 | EXON8_9_CL3 | GGAAATGAGTATTTTGAACCTTCACTCAATGGAAAAGTAAAGTGGGGATCTGGTTTGAAC  | 840 |
| EXON8_9_CL4 | TTCCCTGAGACATCATG                                              | 360 | EXON8_9_CL4 | GGAAATGAGTATTTTGAACCTTCACTCAATGGAAAAGTAAAGTGGGGATCTGGTTTGAAC  | 840 |
|             | *****                                                          |     |             | *****                                                         |     |
| EXON5_CL1   | TCTCAGGGATCCCACTG                                              | 303 | EXON5_CL1   | -----                                                         | 400 |
| EXON5_CL2   | TCTCAGGGATCCCACTG                                              | 303 | EXON5_CL2   | -----                                                         | 400 |
| EXON5_CL3   | TCTCAGGGATCCCACTG                                              | 420 | EXON5_CL3   | -----                                                         | 517 |
| EXON5_CL4   | TCTCAGGGATCCCACTG                                              | 417 | EXON5_CL4   | -----                                                         | 514 |
| EXON8_9_CL1 | TCTCAGGGATCCCACTG                                              | 303 | EXON8_9_CL1 | ATGTGAAAGGATGGTGGAAATTCGAGACAGATACCCAGATCTCTTTCTCTTCTATGAG    | 783 |
| EXON8_9_CL2 | TCTCAGGGATCCCACTG                                              | 303 | EXON8_9_CL2 | ATGTGAAAGGATGGTGGAAATTCGAGACAGATACCCAGATCTCTTTCTCTTCTATGAG    | 783 |
| EXON8_9_CL3 | TCTCAGGGATCCCACTG                                              | 420 | EXON8_9_CL3 | ATGTGAAAGGATGGTGGAAATTCGAGACAGATACCCAGATCTCTTTCTCTTCTATGAG    | 900 |
| EXON8_9_CL4 | TCTCAGGGATCCCACTG                                              | 420 | EXON8_9_CL4 | ATGTGAAAGGATGGTGGAAATTCGAGACAGATACCCAGATCTCTTTCTCTTCTATGAG    | 900 |
|             | *****                                                          |     |             | *****                                                         |     |
| EXON5_CL1   | AGSCGAAGCCAGATG                                                | 363 | EXON5_CL1   | -----                                                         | 400 |
| EXON5_CL2   | AGSCGAAGCCAGATG                                                | 363 | EXON5_CL2   | -----                                                         | 400 |
| EXON5_CL3   | AGSCGAAGCCAGATG                                                | 480 | EXON5_CL3   | -----                                                         | 517 |
| EXON5_CL4   | AGSCGAAGCCAGATG                                                | 477 | EXON5_CL4   | -----                                                         | 514 |
| EXON8_9_CL1 | AGSCGAAGCCAGATG                                                | 363 | EXON8_9_CL1 | ATGTGAAGAGGGACCCAAAGCGTGAAA                                   | 810 |
| EXON8_9_CL2 | AGSCGAAGCCAGATG                                                | 363 | EXON8_9_CL2 | ATGTGAAGAGGGACCCAAAGCGTGAAA                                   | 810 |
| EXON8_9_CL3 | AGSCGAAGCCAGATG                                                | 480 | EXON8_9_CL3 | ATGTGAAGAGGGACCCAAAGCGTGAAA                                   | 927 |
| EXON8_9_CL4 | AGSCGAAGCCAGATG                                                | 480 | EXON8_9_CL4 | ATGTGAAGAGGGACCCAAAGCGTGAAA                                   | 927 |
|             | *****                                                          |     |             | *****                                                         |     |

**Supplemental Figure 2. Sequence and alignment of clones obtained through PCR validation of rat SULT1C2 mRNA as determined by RACE.** Rat hepatic SULT1C2 cDNA was PCR amplified using a forward primer targeting nt 103-123 on exon 2 of the rat SULT1C2 mRNA identified through 5'-RACE and reverse primers targeting either exon 5 or exons 8-9 as described in the Methods. PCR purified bands were gel purified and cloned into the pGEM-T Easy plasmid for sequencing. Shown are the aligned sequences of individual clones (n=4/primer) determined using the Clustal Omega program.

Rondini EA, Pant A, and Kocarek TA. Transcriptional regulation of cytosolic sulfotransferase (SULT)1C2 by intermediates of the cholesterol biosynthetic pathway in primary cultured rat hepatocytes. *The Journal of Pharmacology and Experimental Therapeutics*.

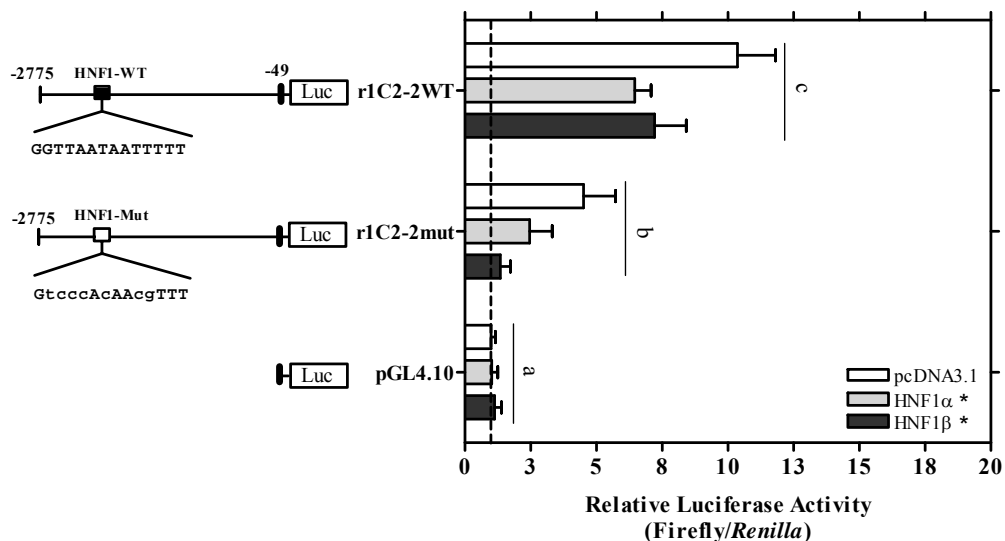

**Supplemental Figure 3. Effect of overexpressing HNF1 $\alpha$  or HNF1 $\beta$  on rat SULT1C2 promoter activity in primary cultured rat hepatocytes.** Primary rat hepatocytes were freshly isolated and plated onto 12 well plates. Twenty four hours following transfection, hepatocytes were transiently transfected with 50 ng of an HNF1 $\alpha$  or HNF1 $\beta$  expression plasmid or pcDNA3.1 control plasmid together with the r1C2-2 reporter, the r1C2-2 reporter containing a mutated HNF1 site (r1C2-2mut), or with an empty vector control (pGL4.10) as described in the Methods. Forty eight hours after transfection, cells were harvested for the measurement of luciferase activity. Bars represent the mean  $\pm$  S.E.M. of luciferase measurements (Firefly/*Renilla*) normalized to the empty vector, pcDNA3.1 controls. Results are combined from 2 independent experiments (n=3 wells/treatment/experiment; each experiment represents one hepatocyte preparation). Significant effects of construct type and expression plasmid were detected. \*, significant effect of the HNF1 expression plasmid compared to the pcDNA3.1 controls ( $P < 0.05$ ). Different letters denote significant differences among the individual constructs on luciferase reporter activity ( $P < 0.05$ ). See manuscript text for additional details.
